# Supplementary material for: Emerging integrated nanoclay-facilitated drug delivery system for papillary thyroid cancer therapy
Source: PubMed Central journal article supplement (PMC5018840; doi:10.1038/srep33335), 2016-09-12
Supplement: srep33335-s1.pdf [file srep33335-s1.pdf]

# Supplementary Information

## Emerging integrated nanoclay-facilitated drug delivery system for papillary thyroid cancer therapy

Yi Zhang<sup>1,†</sup>, Mei Long<sup>1,†</sup>, Peng Huang<sup>2,†</sup>, Huaming Yang<sup>1,3,4,\*</sup>, Shi Chang<sup>2,\*</sup>, Yuehua Hu<sup>1,3</sup>, Aidong Tang<sup>5</sup>, Linfeng Mao<sup>2</sup>

<sup>1</sup> Centre for Mineral Materials, School of Minerals Processing and Bioengineering, Central South University, Changsha 410083, China

<sup>2</sup> Xiangya Hospital, Central South University, Changsha 410078, China

<sup>3</sup> Hunan Key Lab of Mineral Materials and Application, Central South University, Changsha 410083, China

<sup>4</sup> State Key Lab of Powder Metallurgy, Central South University, Changsha 410083, China

<sup>5</sup> School of Chemistry and Chemical Engineering, Central South University, Changsha 410083, China

\* Corresponding author, Email: H.Y.(email: [hmyang@csu.edu.cn](mailto:hmyang@csu.edu.cn)) or S.C.(email: [changshi@csu.edu.cn](mailto:changshi@csu.edu.cn)), Fax: +86-731-88830549, Tel.: +86-731-88710804

† These authors contributed equally to this work.

## Supplementary movie, tables and figures

**Movie 1** The supplementary movie 1 clearly shows the passive targeting research *in vivo* (Fig)

**Table S1** The loading amount, loading efficiency and cumulative release of DOX in DOX-Kaolin and DOX-modified-Kaolin

**Table S2** Parameters of Korsmeyer–Peppas Model of cumulative release of DOX in DOX-Kaolin and DOX-modified-Kaolin

**Figure S1** (a) XRD patterns, FTIR spectra, (c) zeta curves and (d) static water contact angle of the kaolin samples.

**Figure S2** DAPI images of DOX, DOX-Kaolin<sub>MeOH</sub> and KI@DOX-Kaolin<sub>MeOH</sub> at different concentrations

**Figure S3** CLSM images of thyroid cancer cells after the uptake of free DOX, Kaolin<sub>MeOH</sub>, DOX-Kaolin<sub>MeOH</sub>, KI@DOX-Kaolin<sub>MeOH</sub>

**Figure S4** (a) Inhibition of migratory potential of papillary thyroid cancer cells by wound healing assay before and after treatment with free DOX. (b) The percentages of migrated (\*P < 0.05) and (c) invasive (\*P < 0.05) cells determined by the migration and invasion assays

**Figure S5** MTS assay and high-content screening of DOX-Kaolin<sub>MeOH</sub> with representative cancer cells

**Table S1** The loading amount, loading efficiency and cumulative release of DOX in DOX-Kaolin and DOX-modified-Kaolin

| Sample                 | Loading amount of DOX (%) | Loading efficiency (%) | Cumulative release(pH=4.5, 31 h) |
|------------------------|---------------------------|------------------------|----------------------------------|
| Kaolin                 | 54.41                     | 90.69                  | 43.84                            |
| Kaolin <sub>MeOH</sub> | 54.52                     | 90.86                  | 35.87                            |

**Table S2** Parameters of Korsmeyer–Peppas Model of cumulative release of DOX in DOX-Kaolin and DOX-modified-Kaolin

| Sample                 | pH=4.5 |      |       |                | pH=5.5 |      |       |                | pH=7.4 |      |       |                |
|------------------------|--------|------|-------|----------------|--------|------|-------|----------------|--------|------|-------|----------------|
|                        | n      | k    | b     | R <sup>2</sup> | n      | k    | b     | R <sup>2</sup> | n      | k    | b     | R <sup>2</sup> |
| Kaolin                 | 0.46   | 9.67 | -1.58 | 0.99           | 0.54   | 3.74 | -1.19 | 0.96           | 0.39   | 1.15 | -0.23 | 0.93           |
| Kaolin <sub>MeOH</sub> | 0.42   | 9.05 | -1.3  | 0.98           | 0.55   | 3.03 | -0.86 | 0.91           | 0.58   | 0.59 | 0.262 | 0.87           |

$$M_t/M_\infty = kt^n + b$$

k is a constant that incorporates the structure and geometric characteristics of the drug dosage form, n is the release exponent characteristic of the release mechanism, and b represents the burst effect in the release.

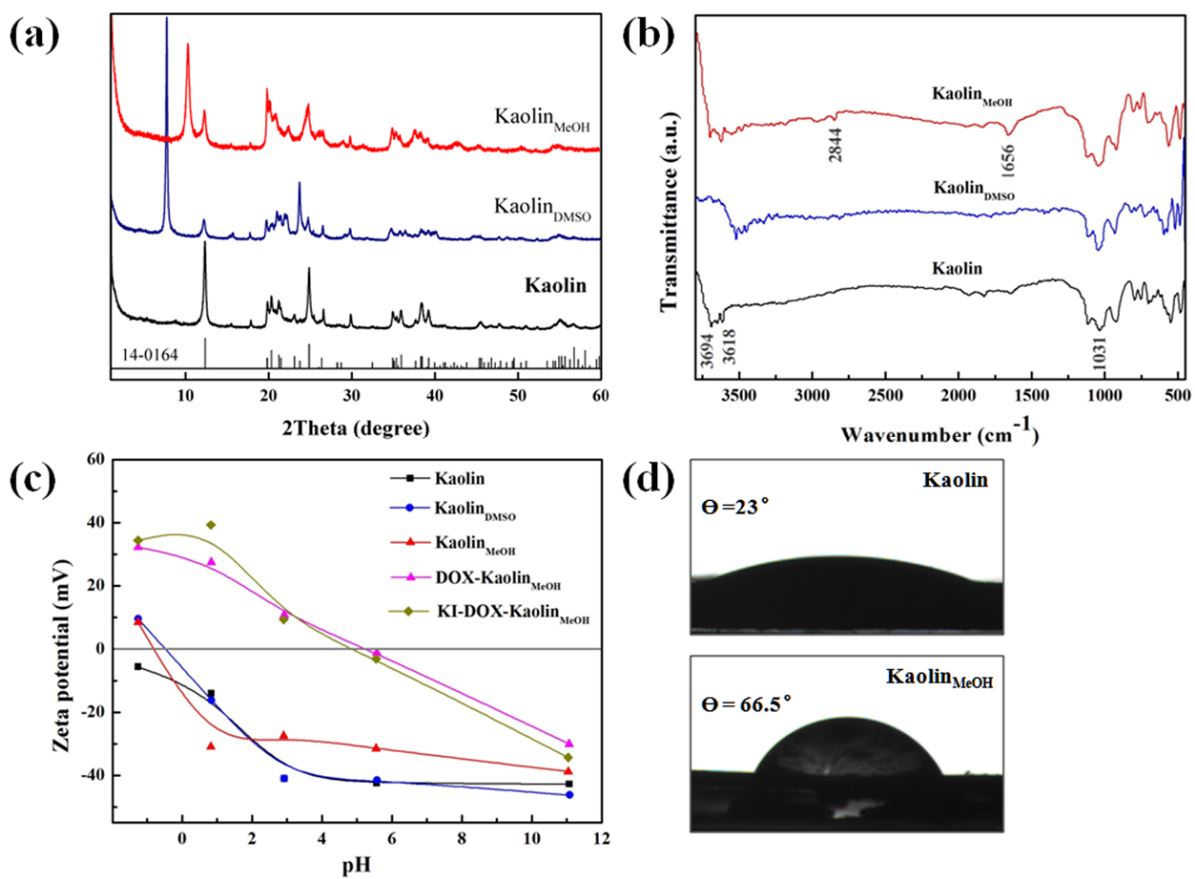

**Figure S1** (a) XRD patterns, (b) FTIR spectra, (c) zeta curves and (d) static water contact angle of the kaolin samples.

## DOX

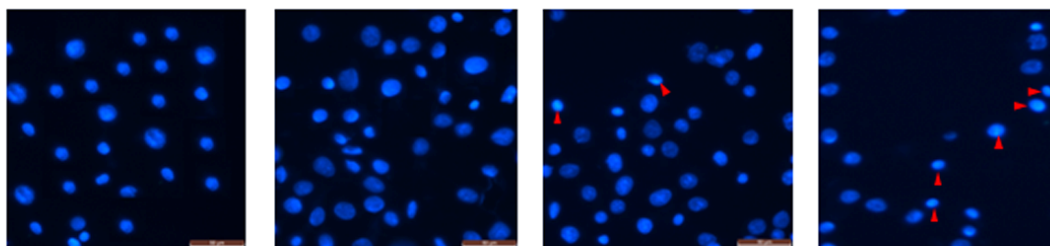

## DOX-Kaolin<sub>MeOH</sub>

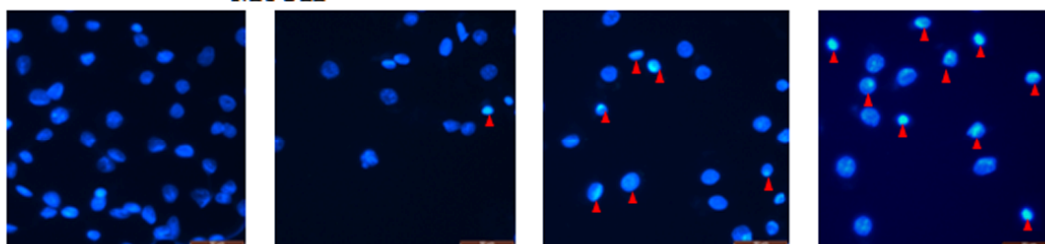

## KI@DOX-Kaolin<sub>MeOH</sub>

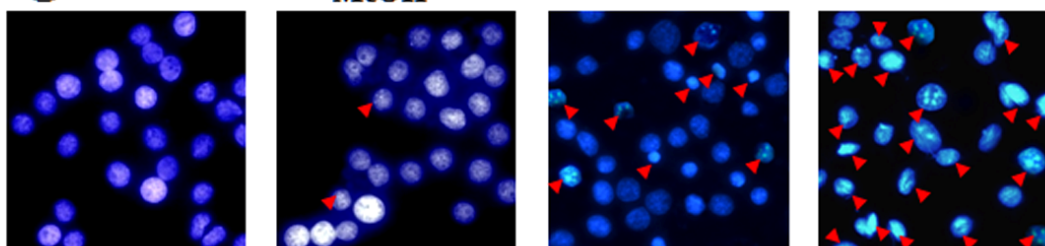

0 µg/mL

50 µg/mL

100 µg/mL

200 µg/mL

**Figure S2** DAPI images of DOX, DOX-Kaolin<sub>MeOH</sub> and KI@DOX-Kaolin<sub>MeOH</sub> at different concentrations

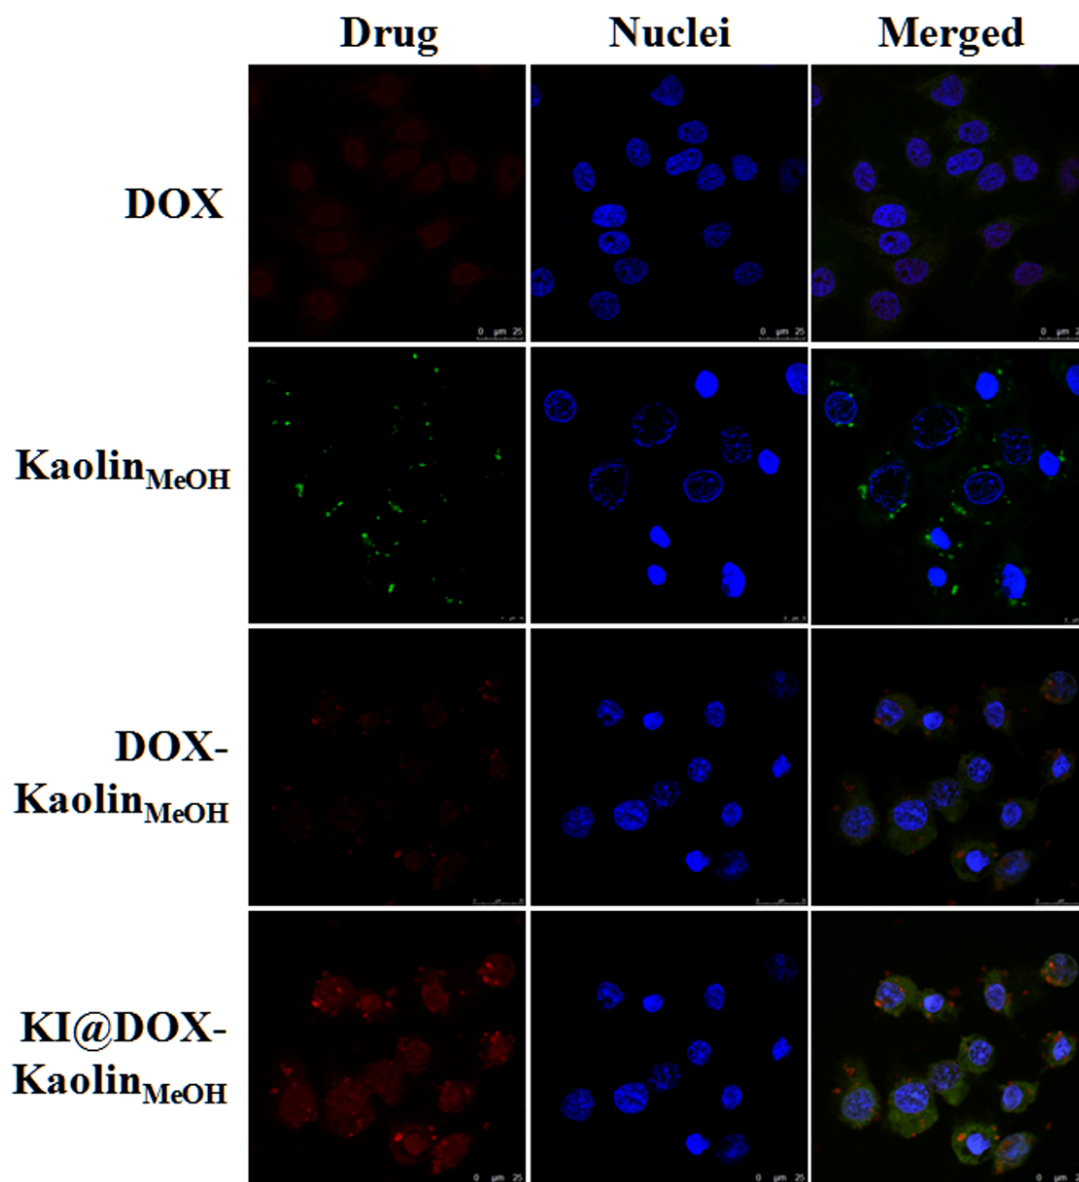

**Figure S3** CLSM images of thyroid cancer cells after the uptake of free DOX, Kaolin<sub>MeOH</sub>, DOX-Kaolin<sub>MeOH</sub>, KI@DOX-Kaolin<sub>MeOH</sub>

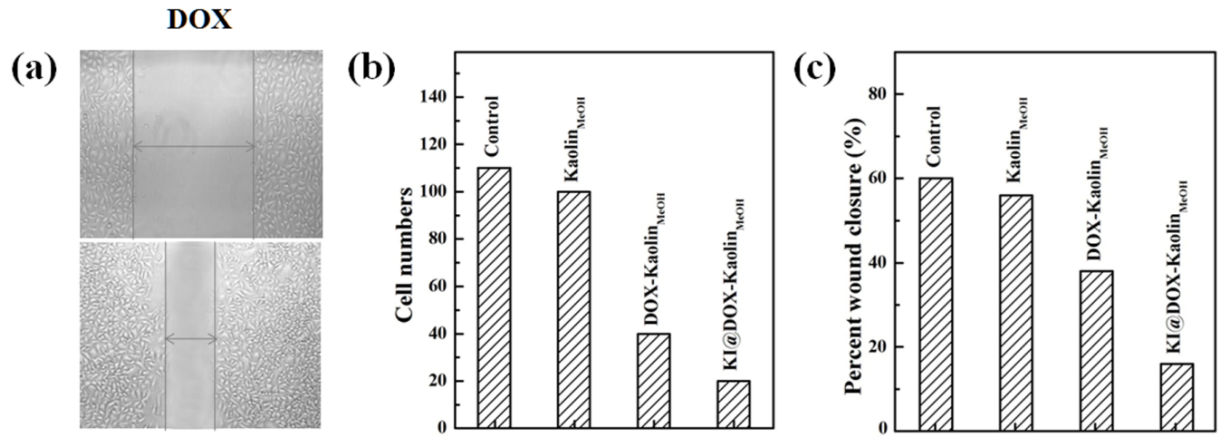

**Figure S4** (a) Inhibition of migratory potential of papillary thyroid cancer cells by wound healing assay before and after treatment with free DOX. (b) The percentages of migrated (\*P < 0.05) and (c) invasive (\*P < 0.05) cells determined by the migration and invasion assays

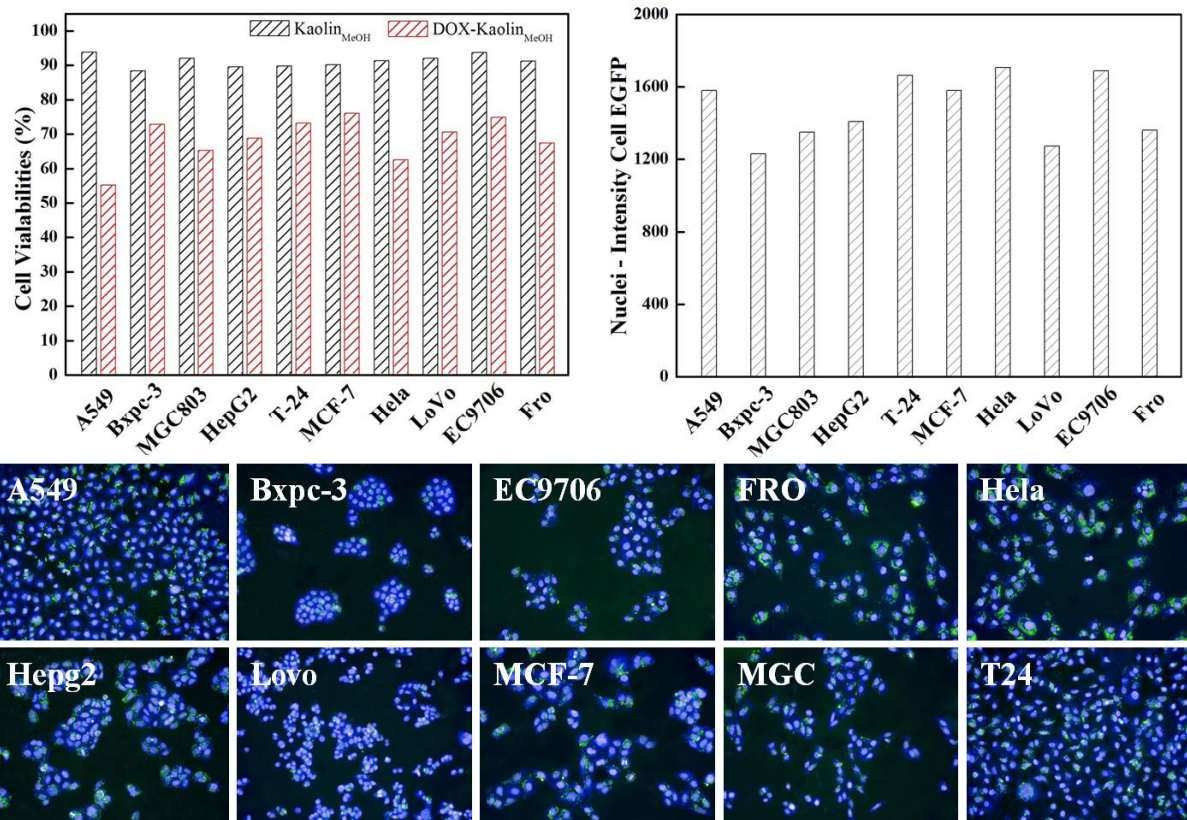

**Figure S5** MTS Assay and High-Content Screening of DOX-Kaolin<sub>MeOH</sub> with representative cancer cells
